# Supplementary figures and images for: Association between the level of partial foot amputation and gait: a scoping review with implications for the minimum impairment criteria for wheelchair tennis
Source: HighWire-hosted journal article supplement (doi:10.1136/bjsports-2022-105650), 2022-12-05

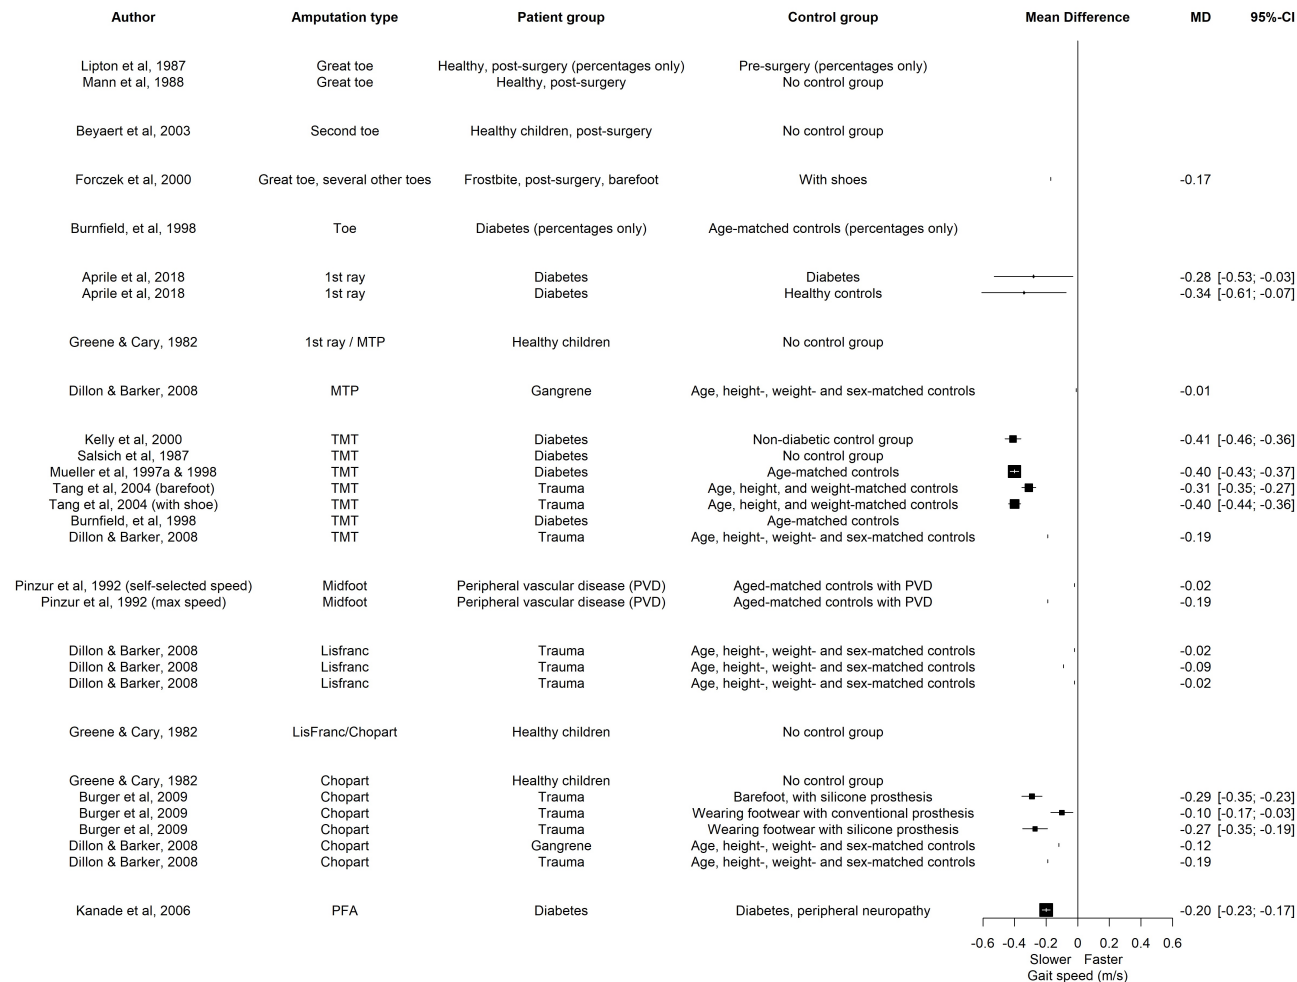

Supplement: bjsports-2022-105650supp006_data_supplement.pdf [file bjsports-2022-105650supp006_data_supplement.pdf]

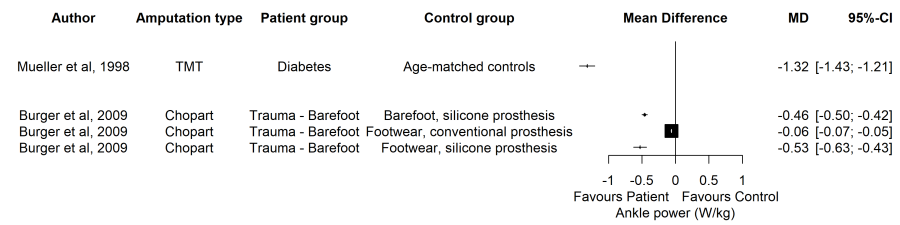

Supplement: bjsports-2022-105650supp008_data_supplement.pdf [file bjsports-2022-105650supp008_data_supplement.pdf]

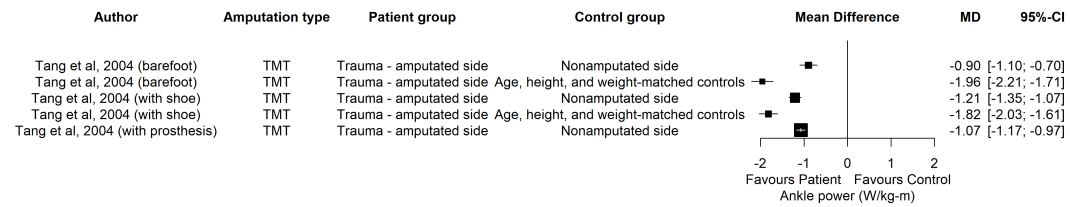

Supplement: bjsports-2022-105650supp009_data_supplement.pdf [file bjsports-2022-105650supp009_data_supplement.pdf]

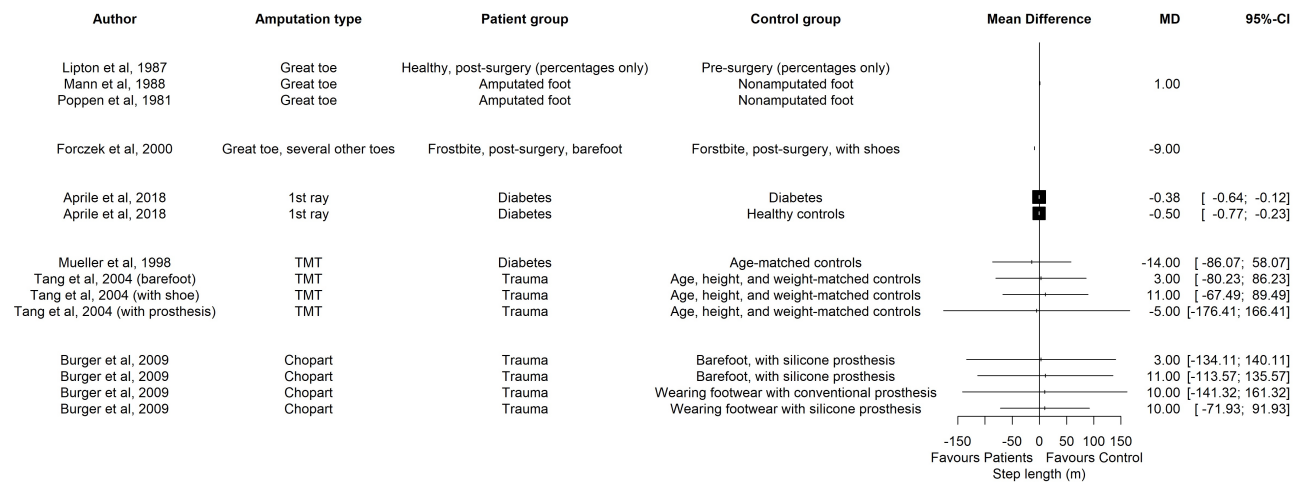

Supplement: bjsports-2022-105650supp010_data_supplement.pdf [file bjsports-2022-105650supp010_data_supplement.pdf]
